# Supplementary material
Source: publisher figshare collection journal article supplement (https://frontiersin.figshare.com/ndownloader/files/36358152)
Supplement: Supplementary file 1 [file 36358152]

## Sheet: MAG information
MAG_ID	identifier	taxonomy	total_length	num_contigs	N50	GC_content	percent_completion	percent_redundancy	study_accession	sample_accession	analysis_accession	analysis_type	tax_id	scientific_name	submitted_ftp
116	METABAT__116	d__Bacteria; p__Proteobacteria; c__Gammaproteobacteria; o__Pseudomonadales; f__Pseudohongiellaceae; g__OM182	1958700	369	5996	52.9829	81.6901	4.22535	PRJEB41565	SAMEA7874660	ERZ1737943	SEQUENCE_ASSEMBLY	1913989	Gammaproteobacteria bacterium	ftp.sra.ebi.ac.uk/vol1/ERZ173/ERZ1737943/METABAT__116-surface-contigs.fa.gz
121	METABAT__121	d__Bacteria; p__Proteobacteria; c__Gammaproteobacteria; o__PS1; f__Thioglobaceae; g__Thioglobus	1302825	166	9827	35.4241	84.507	7.04225	PRJEB41565	SAMEA7874665	ERZ1737948	SEQUENCE_ASSEMBLY	1427364	Candidatus Pseudothioglobus singularis	ftp.sra.ebi.ac.uk/vol1/ERZ173/ERZ1737948/METABAT__121-surface-contigs.fa.gz
133	METABAT__133	d__Bacteria; p__Bacteroidota; c__Bacteroidia; o__Flavobacteriales; f__Flavobacteriaceae; g__Polaribacter	1908252	287	7817	32.6606	60.5634	4.22535	PRJEB41565	SAMEA7874671	ERZ1737953	SEQUENCE_ASSEMBLY	1871037	Flavobacteriaceae bacterium	ftp.sra.ebi.ac.uk/vol1/ERZ173/ERZ1737953/METABAT__133-surface-contigs.fa.gz
136	METABAT__136	d__Bacteria; p__Bacteroidota; c__Bacteroidia; o__Flavobacteriales; f__Flavobacteriaceae; g__SGZJ01	1372765	241	6245	31.0765	66.1972	1.40845	PRJEB41565	SAMEA7874674	ERZ1737956	SEQUENCE_ASSEMBLY	2021391	Flavobacteriales bacterium	ftp.sra.ebi.ac.uk/vol1/ERZ173/ERZ1737956/METABAT__136-surface-contigs.fa.gz
142	METABAT__142	d__Eukaryota; p__Chlorophyta; c__Mamiellophyceae; o__Mamiellales; f__Bathycoccaceae; g__Bathycoccaceae	9821382	2123	4749	48.5162	67.4699	0	PRJEB41565	SAMEA7874677	ERZ1737959	SEQUENCE_ASSEMBLY	100272	uncultured eukaryote	ftp.sra.ebi.ac.uk/vol1/ERZ173/ERZ1737959/METABAT__142-surface-contigs.fa.gz
157	METABAT__157	d__Bacteria; p__Proteobacteria; c__Gammaproteobacteria; o__Pseudomonadales; f__Porticoccaceae; g__HTCC2207	2300115	144	27049	44.2728	97.1831	8.4507	PRJEB41565	SAMEA7874683	ERZ1737965	SEQUENCE_ASSEMBLY	2026782	Porticoccaceae bacterium	ftp.sra.ebi.ac.uk/vol1/ERZ173/ERZ1737965/METABAT__157-surface-contigs.fa.gz
178	METABAT__178	d__Bacteria; p__Proteobacteria; c__Alphaproteobacteria; o__Rhodobacterales; f__Rhodobacteraceae; g__Planktomarina	2205478	106	38438	53.3054	95.7746	1.40845	PRJEB41565	SAMEA7874691	ERZ1737973	SEQUENCE_ASSEMBLY	1898112	Rhodospirillaceae bacterium	ftp.sra.ebi.ac.uk/vol1/ERZ173/ERZ1737973/METABAT__178-surface-contigs.fa.gz
180	METABAT__180	d__Bacteria; p__Proteobacteria; c__Gammaproteobacteria; o__SAR86; f__D2472; g__SCGC-AAA076-P13	892033	169	5602	34.7442	50.7042	7.04225	PRJEB41565	SAMEA7874693	ERZ1737975	SEQUENCE_ASSEMBLY	1913988	Alphaproteobacteria bacterium	ftp.sra.ebi.ac.uk/vol1/ERZ173/ERZ1737975/METABAT__180-surface-contigs.fa.gz
181	METABAT__181	d__Bacteria; p__Proteobacteria; c__Alphaproteobacteria; o__Rhodobacterales; f__Rhodobacteraceae; g__Amylibacter	2104690	151	28524	37.1582	95.7746	0	PRJEB41565	SAMEA7874694	ERZ1737976	SEQUENCE_ASSEMBLY	1913989	Gammaproteobacteria bacterium	ftp.sra.ebi.ac.uk/vol1/ERZ173/ERZ1737976/METABAT__181-surface-contigs.fa.gz
194	METABAT__194	d__Bacteria; p__Cyanobacteria; c__Cyanobacteriia; o__PCC-6307; f__Cyanobiaceae; g__Synechococcus_E	1553062	187	11169	56.159	88.7324	2.8169	PRJEB41565	SAMEA7874696	ERZ1737978	SEQUENCE_ASSEMBLY	2461416	Cyanobacteria bacterium	ftp.sra.ebi.ac.uk/vol1/ERZ173/ERZ1737978/METABAT__194-surface-contigs.fa.gz
22	METABAT__22	d__Bacteria; p__Proteobacteria; c__Gammaproteobacteria; o__SAR86; f__D2472; g__D2472	1301798	172	9981	36.8496	53.5211	5.6338	PRJEB41565	SAMEA7874709	ERZ1737991	SEQUENCE_ASSEMBLY	1849603	Enterobacteriaceae bacterium	ftp.sra.ebi.ac.uk/vol1/ERZ173/ERZ1737991/METABAT__22-surface-contigs.fa.gz
224	METABAT__224	d__Bacteria; p__Bacteroidota; c__Bacteroidia; o__Flavobacteriales; f__Flavobacteriaceae; g__MED-G11	1038855	234	4440	30.1081	70.4225	7.04225	PRJEB41565	SAMEA7874711	ERZ1737993	SEQUENCE_ASSEMBLY	1898111	Cryomorphaceae bacterium	ftp.sra.ebi.ac.uk/vol1/ERZ173/ERZ1737993/METABAT__224-surface-contigs.fa.gz
274	METABAT__274	d__Bacteria; p__Bacteroidota; c__Bacteroidia; o__Flavobacteriales; f__Flavobacteriaceae; g__MAG-121220-bin8	1387298	301	4783	48.7	49.2958	0	PRJEB41565	SAMEA7874728	ERZ1738010	SEQUENCE_ASSEMBLY	1898111	Cryomorphaceae bacterium	ftp.sra.ebi.ac.uk/vol1/ERZ173/ERZ1738010/METABAT__274-surface-contigs.fa.gz
278	METABAT__278	d__Bacteria; p__Proteobacteria; c__Gammaproteobacteria; o__Pseudomonadales; f__Nitrincolaceae; g__ASP10-02a	1618023	284	6020	30.1989	88.7324	8.4507	PRJEB41565	SAMEA7874732	ERZ1738014	SEQUENCE_ASSEMBLY	1899355	Oceanospirillaceae bacterium	ftp.sra.ebi.ac.uk/vol1/ERZ173/ERZ1738014/METABAT__278-surface-contigs.fa.gz
67	METABAT__67	d__Bacteria; p__Bacteroidota; c__Bacteroidia; o__Chitinophagales; f__Saprospiraceae; g__UBA1994	2709031	287	11622	36.2334	95.7746	4.22535	PRJEB41565	SAMEA7874745	ERZ1738027	SEQUENCE_ASSEMBLY	2202734	Saprospiraceae bacterium	ftp.sra.ebi.ac.uk/vol1/ERZ173/ERZ1738027/METABAT__67-surface-contigs.fa.gz
71	METABAT__71	d__Eukaryota; p__Chlorophyta; c__Mamiellophyceae; o__Mamiellales; f__Bathycoccaceae; g__Micromonas	11080519	2340	4952	63.3259	62.6506	1.20482	PRJEB41565	SAMEA7874748	ERZ1738030	SEQUENCE_ASSEMBLY	100272	uncultured eukaryote	ftp.sra.ebi.ac.uk/vol1/ERZ173/ERZ1738030/METABAT__71-surface-contigs.fa.gz
9	METABAT__9	d__Bacteria; p__Bacteroidota; c__Bacteroidia; o__Flavobacteriales; f__Flavobacteriaceae; g__SCGC-AAA160-P02	2017051	251	10525	31.6869	88.7324	7.04225	PRJEB41565	SAMEA7874755	ERZ1738037	SEQUENCE_ASSEMBLY	1871037	Flavobacteriaceae bacterium	ftp.sra.ebi.ac.uk/vol1/ERZ173/ERZ1738037/METABAT__9-surface-contigs.fa.gz
* scientific_name acccording to NCBI taxonomy; completion and redundancy estimates calculated with CheckM (Parks et al., 2015)
		s
